# Supplementary material for: The Joint Contributions of Environmental Filtering and Spatial Processes to Macroinvertebrate Metacommunity Dynamics in the Alpine Stream Environment of Baima Snow Mountain, Southwest China
Source: MDPI journal article supplement (doi:10.3390/d14010028), 2022-01-03
Supplement: s1 [file s1]

**Table S1:** The correlation between environmental factors based on the Pearson correlation. Stars next to values stand for the level of significance: according to the code: (\*)  $0.05 \leq p\text{-values} < 0.01$ ; (\*\*)  $0.01 \leq p\text{-values} < 0.001$ ; (\*\*\*)  $p\text{-values} \leq 0.001$ .

|      | ALT      | COND     | Sal     | TDS     | WT       | DO       | pH       | ORP    |
|------|----------|----------|---------|---------|----------|----------|----------|--------|
| ALT  | 1        | -0.83*** | -0.57** | -0.6**  | -0.77*** | -0.01    | -0.22    | 0.3    |
| COND | -0.83*** | 1        | 0.87*** | 0.89*** | 0.66***  | 0.07     | 0.2      | -0.45* |
| Sal  | -0.57**  | 0.87***  | 1       | 0.99*** | 0.22     | 0.4*     | -0.09    | -0.4*  |
| TDS  | -0.6**   | 0.89***  | 0.99*** | 1       | 0.24     | 0.4*     | -0.1     | -0.41* |
| WT   | -0.77*** | 0.66***  | 0.22    | 0.24    | 1        | -0.5**   | 0.58**   | -0.27  |
| DO   | -0.01    | 0.07     | 0.4*    | 0.4*    | -0.5**   | 1        | -0.73*** | -0.45* |
| pH   | -0.22    | 0.2      | -0.09   | -0.1    | 0.58**   | -0.73*** | 1        | 0.27   |
| ORP  | 0.3      | -0.45*   | -0.4*   | -0.41*  | -0.27*   | -0.45    | 0.27     | 1      |
