# Supplementary material for: The Joint Contributions of Environmental Filtering and Spatial Processes to Macroinvertebrate Metacommunity Dynamics in the Alpine Stream Environment of Baima Snow Mountain, Southwest China
Source: MDPI journal article supplement (doi:10.3390/d14010028), 2022-01-03
Supplement: s1 [file s1]

**Table S2** Identified taxa of macroinvertebrates found in the Sharong stream of Baima Snow Mountain, Yunnan, China. Abund refers to abundance and Prop refers to proportions of each taxon in different years. The top 3 dominant species have shown in bold in the table for each year.

| Phyla      | Classes | Families          | Orders      | Genus/Taxa                     | id   | 2017<br>Abund | 2017<br>Prop | 2018<br>Abund | 2018<br>Prop | 2019<br>Abund | 2019<br>Prop |
|------------|---------|-------------------|-------------|--------------------------------|------|---------------|--------------|---------------|--------------|---------------|--------------|
| Arthropoda | Insecta | Perlidae          | Plecoptera  | <i>Kamimuria</i> sp.           | Sp1  | 2             | 0.04         | 2             | 0.05         | 7             | 0.06         |
| Arthropoda | Insecta | Perlidae          | Plecoptera  | <i>Neoperla</i> sp.            | Sp2  | 1             | 0.02         | 0             | 0            | 0             | 0            |
| Arthropoda | Insecta | Perlodidae        | Plecoptera  | <i>Paracapnia</i> sp.          | Sp3  | 57            | 1.36         | 12            | 0.34         | 57            | 0.56         |
| Arthropoda | Insecta | Perlodidae        | Plecoptera  | <i>Isoperla</i> sp.            | Sp4  | 25            | 0.59         | 4             | 0.11         | 13            | 0.12         |
| Arthropoda | Insecta | Peltoperlidae     | Plecoptera  | <i>Cryptoterla</i> sp.         | Sp5  | 27            | 0.64         | 20            | 0.56         | 25            | 0.24         |
| Arthropoda | Insecta | Chloroperlidae    | Plecoptera  | <i>Sweltsa</i> sp.             | Sp6  | 12            | 0.28         | 0             | 0            | 67            | 0.66         |
| Arthropoda | Insecta | Capniidae         | Plecoptera  | <i>Eucapnopsis</i> sp.         | Sp7  | 113           | 2.70         | 260           | 7.40         | 364           | 3.59         |
| Arthropoda | Insecta | Nemouridae        | Plecoptera  | <i>Amphinemura</i> sp1.        | Sp8  | 119           | 2.84         | 136           | 3.87         | 1050          | <b>10.36</b> |
| Arthropoda | Insecta | Nemouridae        | Plecoptera  | <i>Amphinemura</i> sp2.        | Sp9  | 38            | 0.90         | 0             | 0            | 2             | 0.01         |
| Arthropoda | Insecta | Nemouridae        | Plecoptera  | <i>Nemoura</i> sp.             | Sp10 | 0             | 0            | 0             | 0            | 1             | 0.009        |
| Arthropoda | Insecta | Rhyacophilidae    | Trichoptera | <b><i>Rhyacophila</i> sp1.</b> | Sp11 | 18            | 0.43         | 16            | 0.45         | 90            | 0.88         |
| Arthropoda | Insecta | Rhyacophilidae    | Trichoptera | <i>Rhyacophila</i> sp2.        | Sp12 | 1             | 0.02         | 0             | 0            | 0             | 0            |
| Arthropoda | Insecta | Stenopsychidae    | Trichoptera | <i>Stenopsyche</i> sp.         | Sp13 | 122           | 2.91         | 24            | 0.68         | 35            | 0.34         |
| Arthropoda | Insecta | Rhyacophilidae    | Trichoptera | <i>Himalopsyche</i> sp1.       | Sp14 | 1             | 0.02         | 1             | 0.02         | 4             | 0.03         |
| Arthropoda | Insecta | Rhyacophilidae    | Trichoptera | <i>Himalopsyche</i> sp2.       | Sp15 | 0             | 0            | 0             | 0            | 6             | 0.05         |
| Arthropoda | Insecta | Hydropsychidae    | Trichoptera | <i>Hydropsyche</i> sp.         | Sp16 | 15            | 0.35         | 14            | 0.39         | 52            | 0.51         |
| Arthropoda | Insecta | Hydropsychidae    | Trichoptera | <i>Macrostemum</i> sp.         | Sp17 | 0             | 0            | 0             | 0            | 1             | 0.009        |
| Arthropoda | Insecta | Lepidostomatidae  | Trichoptera | <i>Lepidostoma</i> sp1.        | Sp18 | 5             | 0.11         | 7             | 0.19         | 0             | 0            |
| Arthropoda | Insecta | Lepidostomatidae  | Trichoptera | <i>Lepidostoma</i> sp2.        | Sp19 | 44            | 1.05         | 17            | 0.48         | 0             | 0            |
| Arthropoda | Insecta | Limnephilidae     | Trichoptera | <i>Phylloicus</i> sp.          | Sp20 | 15            | 0.35         | 25            | 0.71         | 35            | 0.34         |
| Arthropoda | Insecta | Leptocerdae       | Trichoptera | <i>Nectopsyche</i> sp.         | Sp21 | 3             | 0.07         | 0             | 0            | 19            | 0.18         |
| Arthropoda | Insecta | Glossosomatidae   | Trichoptera | <i>Glossosoma</i> sp.          | Sp22 | 3             | 0.07         | 2             | 0.05         | 77            | 0.76         |
| Arthropoda | Insecta | Philopotamidae    | Trichoptera | <i>Chimarra</i> sp.            | Sp23 | 0             | 0            | 1             | 0.02         | 13            | 0.12         |
| Arthropoda | Insecta | Athericidae       | Diptera     | <i>Suragina</i> sp.            | Sp24 | 6             | 0.14         | 19            | 0.54         | 31            | 0.30         |
| Arthropoda | Insecta | Tipulidae         | Diptera     | <i>Tipula</i> sp.              | Sp25 | 1             | 0.02         | 2             | 0.05         | 7             | 0.06         |
| Arthropoda | Insecta | Limoniidae        | Diptera     | <i>Hexatoma</i> sp.            | Sp26 | 15            | 0.35         | 10            | 0.28         | 38            | 0.37         |
| Arthropoda | Insecta | Tipulidae         | Diptera     | <i>Antocha</i> sp.             | Sp27 | 23            | 0.54         | 1             | 0.02         | 58            | 0.57         |
| Arthropoda | Insecta | Tabanidae         | Diptera     | <i>Tabanus</i> sp.             | Sp28 | 0             | 0            | 0             | 0            | 1             | 0.009        |
| Arthropoda | Insecta | Tipulidae         | Diptera     | <i>Dicranota</i> sp.           | Sp29 | 19            | 0.45         | 23            | 0.65         | 50            | 0.49         |
| Arthropoda | Insecta | Ceratopogonidae   | Diptera     | <i>Bezzia</i> sp.              | Sp30 | 1             | 0.02         | 2             | 0.05         | 11            | 0.10         |
| Arthropoda | Insecta | Orthocladiidae    | Diptera     | <b>Orthocladiidae</b>          | Sp31 | 62            | 1.48         | 382           | <b>10.88</b> | 521           | 5.14         |
| Arthropoda | Insecta | Tanypodinae       | Diptera     | Tanypodinae                    | Sp32 | 0             | 0            | 0             | 0            | 3             | 0.02         |
| Arthropoda | Insecta | Chironominae      | Diptera     | Chironominae                   | Sp33 | 25            | 0.59         | 19            | 0.54         | 101           | 0.99         |
| Arthropoda | Insecta | Chironomidae      | Diptera     | Chironomidae                   | Sp34 | 9             | 0.21         | 8             | 0.22         | 36            | 0.35         |
| Arthropoda | Insecta | Dixidae           | Diptera     | <i>Dixella</i> sp              | Sp35 | 2             | 0.04         | 0             | 0            | 11            | 0.10         |
| Arthropoda | Insecta | Deuterophlebiidae | Diptera     | <i>Deuterophlebia</i> sp.      | Sp36 | 6             | 0.14         | 6             | 0.17         | 63            | 0.62         |
| Arthropoda | Insecta | Deuterophlebiidae | Diptera     | <i>Deuterophlebia</i> sp.      | Sp37 | 0             | 0            | 1             | 0.02         | 0             | 0            |

|                 |               |                 |                  |                              |      |     |       |     |       |      |       |
|-----------------|---------------|-----------------|------------------|------------------------------|------|-----|-------|-----|-------|------|-------|
| Arthropoda      | Insecta       | Dolichopodidae  | Diptera          | Dolichopodidae               | Sp38 | 0   | 0     | 3   | 0.08  | 9    | 0.08  |
| Arthropoda      | Insecta       | Simuliidae      | Diptera          | <i>Prosimulium</i> sp.       | Sp39 | 151 | 3.60  | 100 | 2.84  | 1232 | 12.16 |
| Arthropoda      | Insecta       | Psychodidae     | Diptera          | <i>Pericoma</i> sp.          | Sp40 | 64  | 1.52  | 112 | 3.19  | 193  | 1.90  |
| Arthropoda      | Insecta       | Psychodidae     | Diptera          | <i>Maruina</i> sp.           | Sp41 | 0   | 0     | 0   | 0     | 1    | 0.009 |
| Arthropoda      | Insecta       | Baetidae        | Ephemeroptera    | <i>Baetis</i> sp1.           | Sp42 | 976 | 23.32 | 283 | 8.06  | 968  | 9.55  |
| Arthropoda      | Insecta       | Baetidae        | Ephemeroptera    | <i>Baetis</i> sp2.           | Sp43 | 2   | 0.04  | 0   | 0     | 0    | 0     |
| Arthropoda      | Insecta       | Baetidae        | Ephemeroptera    | <i>Alainites</i> sp.         | Sp44 | 200 | 4.78  | 193 | 5.49  | 181  | 1.78  |
| Arthropoda      | Insecta       | Baetidae        | Ephemeroptera    | <i>Baetiella marginata</i> . | Sp45 | 541 | 12.93 | 753 | 21.45 | 2447 | 24.15 |
| Arthropoda      | Insecta       | Baetidae        | Ephemeroptera    | <i>Baetiella sexta</i> .     | Sp46 | 25  | 0.59  | 0   | 0     | 8    | 0.078 |
| Arthropoda      | Insecta       | Siphonuridae    | Ephemeroptera    | <i>Ameletus</i> sp.          | Sp47 | 1   | 0.02  | 5   | 0.14  | 3    | 0.02  |
| Arthropoda      | Insecta       | Leptophlebiidae | Ephemeroptera    | <i>Habrophlebiodes</i> sp.   | Sp48 | 1   | 0.02  | 0   | 0     | 42   | 0.41  |
| Arthropoda      | Insecta       | Caenidae        | Ephemeroptera    | <i>Caenis</i> sp.            | Sp49 | 1   | 0.02  | 0   | 0     | 0    | 0     |
| Arthropoda      | Insecta       | Heptageniidae   | Ephemeroptera    | <i>Iron</i> sp1.             | Sp50 | 13  | 0.31  | 1   | 0.02  | 0    | 0     |
| Arthropoda      | Insecta       | Heptageniidae   | Ephemeroptera    | <i>Epeorus</i> sp.           | Sp51 | 94  | 2.24  | 99  | 2.82  | 248  | 2.44  |
| Arthropoda      | Insecta       | Heptageniidae   | Ephemeroptera    | <i>Iron</i> sp2.             | Sp52 | 0   | 0     | 11  | 0.31  | 15   | 0.14  |
| Arthropoda      | Insecta       | Heptageniidae   | Ephemeroptera    | <i>Ecdyonurus</i> sp.        | Sp53 | 33  | 0.78  | 147 | 4.18  | 181  | 1.78  |
| Arthropoda      | Insecta       | Heptageniidae   | Ephemeroptera    | <i>Rhithrogena</i> sp1.      | Sp54 | 818 | 19.55 | 57  | 1.62  | 18   | 0.17  |
| Arthropoda      | Insecta       | Heptageniidae   | Ephemeroptera    | <i>Rhithrogena</i> sp2.      | Sp55 | 1   | 0.02  | 0   | 0     | 0    | 0     |
| Arthropoda      | Insecta       | Ephemera        | Ephemeroptera    | <i>Ephemera</i> sp.          | Sp56 | 0   | 0     | 1   | 0.02  | 1    | 0.009 |
| Arthropoda      | Insecta       | Ephemera        | Ephemeroptera    | <i>Ephemera</i> hsui         | Sp57 | 0   | 0     | 1   | 0.02  | 0    | 0     |
| Arthropoda      | Insecta       | Psephenidae     | Coleoptera       | <i>Nipponeubria</i> sp.      | Sp58 | 0   | 0     | 0   | 0     | 1    | 0.009 |
| Arthropoda      | Insecta       | Scirtidae       | Coleoptera       | <i>Hydrocyphon</i> sp.       | Sp59 | 42  | 1.00  | 40  | 1.13  | 82   | 0.80  |
| Arthropoda      | Insecta       | Elmidae         | Coleoptera       | Elmidae                      | Sp60 | 26  | 0.62  | 29  | 0.82  | 13   | 0.12  |
| Arthropoda      | Insecta       | Elmidae         | Coleoptera       | <i>Stenelmis</i> sp.         | Sp61 | 3   | 0.07  | 25  | 0.71  | 93   | 0.91  |
| Arthropoda      | Insecta       | Elmidae         | Coleoptera       | <i>Oulimnius</i> sp.         | Sp62 | 75  | 1.79  | 1   | 0.02  | 18   | 0.17  |
| Arthropoda      | Insecta       | Dytiscidae      | Coleoptera       | <i>Hydaticus</i> sp.         | Sp63 | 0   | 0     | 1   | 0.02  | 0    | 0     |
| Arthropoda      | Insecta       | Hydrophilidae   | Coleoptera       | <i>Berosus</i> sp.           | Sp64 | 0   | 0     | 1   | 0.02  | 0    | 0     |
| Annelida        | Clitellata    | Tubificidae     | Tubificida       | <i>Limnodrilus</i> sp.       | Sp65 | 304 | 7.26  | 599 | 17.06 | 1458 | 14.39 |
| Platyhelminthes | Rhabditophora | Planariidae     | Tricladida       | <i>Planaria</i> sp.          | Sp66 | 0   | 0     | 4   | 0.11  | 15   | 0.14  |
| Annelida        | Clitellata    | Glossiphoniidae | Arhynchobdellida | <i>Erpobdella</i> sp.        | Sp67 | 1   | 0.02  | 2   | 0.05  | 4    | 0.04  |
| Arthropoda      | Arachnida     | Hydrachnidae    | Trombidiformes   | water mites                  | Sp68 | 1   | 0.02  | 1   | 0.02  | 17   | 0.16  |
| Arthropoda      | Entognatha    | Poduridae       | Poduromorpha     | <i>Podura</i> sp.            | Sp69 | 0   | 0     | 4   | 0.11  | 4    | 0.04  |
| Arthropoda      | Malacostraca  | Gammaridae      | Amphipoda        | <i>Gammarus</i> sp.          | Sp70 | 21  | 0.50  | 23  | 0.65  | 27   | 0.26  |
| Arthropoda      | Insecta       | Osmylidae       | Neuroptera       | <i>Osmylus</i> sp.           | Sp71 | 0   | 0     | 0   | 0     | 1    | 0.009 |
